# Supplementary material for: Attenuated G protein signaling and minimal receptor phosphorylation as a biochemical signature of low side-effect opioid analgesics
Source: PubMed Central journal article supplement (PMC9065038; doi:10.1038/s41598-022-11189-6), 2022-05-03
Supplement: 41598_2022_11189_MOESM1_ESM.pdf [file 41598_2022_11189_MOESM1_ESM.pdf]

**AT-034**

**NOP**

HA-UNOP  
HEU

Kontrollreihe AT-034

V: 5.10.18

pT362/S363

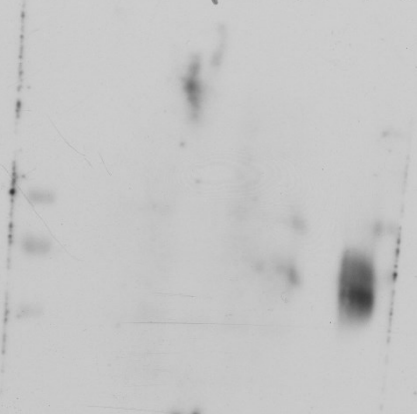

- 1  $\emptyset$
  - 2 1  $\mu$ M
  - 3 10  $\mu$ M
  - 4 100  $\mu$ M
  - 5 1  $\mu$ M
  - 6 10  $\mu$ M
  - 7 NiofQ 10  $\mu$ M
- } 10'  
37°C

1 2 3 4 5 6 - 7

10.10.18

HA-UNOP  
HEU

Kontrollreihe AT-034

V: 5.10.18

pT362/S363

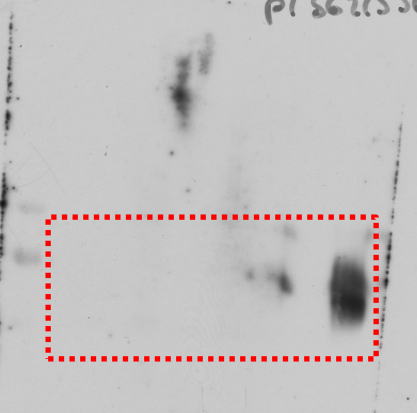

- 1  $\emptyset$
  - 2 1  $\mu$ M
  - 3 10  $\mu$ M
  - 4 100  $\mu$ M
  - 5 1  $\mu$ M
  - 6 10  $\mu$ M
  - 7 NiofQ 10  $\mu$ M
- } 10'  
37°C

1 2 3 4 5 6 - 7

10.10.18

AT-034

NOP; pT362/S363

HA-LAMP  
HEU

Wnt3-Rein AT-034 v: 5.10.18

pS346

- 1 0
  - 2 1nM
  - 3 10nM
  - 4 100nM
  - 5 1µM
  - 6 10µM
  - 7 NIOFR 10µM
- } 37°C  
10'

...FUJI...HRC...()

1 2 3 4 5 6 - 7

11.10.18

HA-LAMP  
HEU

Wnt3-Rein AT-034 v: 5.10.18

pS346

- 1 0
  - 2 1nM
  - 3 10nM
  - 4 100nM
  - 5 1µM
  - 6 10µM
  - 7 NIOFR 10µM
- } 37°C  
10'

...FUJI...HRC...()SAF

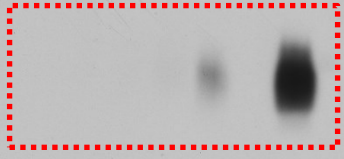

AT-034

NOP; pS346

1 2 3 4 5 6 - 7

11.10.18

HA-hNOP  
HEU

Went-Reihe AT-034

V: 5.10.17

pS351

- 1 0
  - 2 10µM
  - 3 100µM
  - 4 1000µM
  - 5 1µM
  - 6 10µM
  - 7 N10 f2 10µM
- } 10'  
37°C

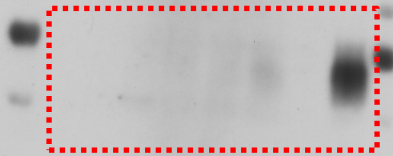

AT-034

NOP; pS351

1 2 3 4 5 6 - 7

10.10.17

HA-hNOP  
HEU

Went-Reihe AT-034

V: 5.10.18

pS351

- 1 0
  - 2 1µM
  - 3 10µM
  - 4 100µM
  - 5 1µM
  - 6 10µM
  - 7 N10 f2 10µM
- } 10'  
37°C

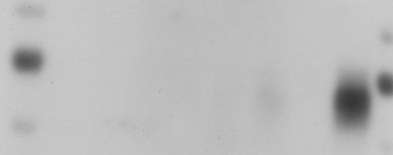

1 2 3 4 5 6 - 7

10.10.17

HA-hNCP  
HEC

Wort. Reihe AT-034  
u871

V. 8. 10. 18

- 1 20
  - 2 100n
  - 3 100n
  - 4 100n
  - 5 1µM
  - 6 10µM
  - 7 N10FQ 10µM
- } 10'  
37°C

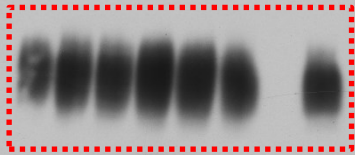

AT-034

NOP

1 2 3 4 5 6 - 7

12. 10. 18

HA-hNCP  
HEC

Wort. Reihe AT-034  
u871

V. 5. 10. 18

- 1 20
  - 2 100n
  - 3 100n
  - 4 100n
  - 5 1µM
  - 6 10µM
  - 7 ~~20µM~~ N10FQ 10µM
- } 37°C  
10'

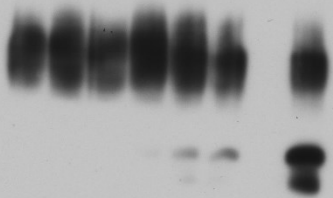

1 2 3 4 5 6 - 7

11. 10. 18

...EHTIHHBC(2)·CBH·ILUE...

**AT-034**

**MOP**

FLAG-HEK293T cells AT-034 v: 13.9.18  
HEK  
pT370

AT-034

MOP; pT370

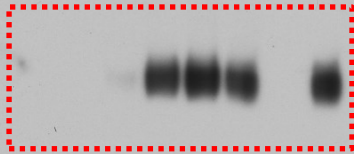

1 2 3 4 5 6 - 7

p135

- 1 29
  - 2 100nM
  - 3 200nM
  - 4 1000nM
  - 5 1µM
  - 6 10µM
  - 7 DAMGO 10µM
- } 30'  
37°C

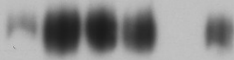

1 2 3 4 5 6 - 7

2.10.18

... (Y) T E E T ...  
... (S) A R H ... I D U ...  
... (S) A R H ... I D U ...

FLAG-UMOR Koz. Reiter AT-034 v: 13.9.18  
HE4 pT370

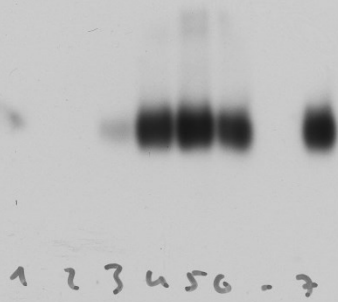

pS375

1 0  
2 10µM  
3 10µM  
4 100µM } 30'  
5 1µM } 37°C  
6 10µM }  
7 DMSO 10µM

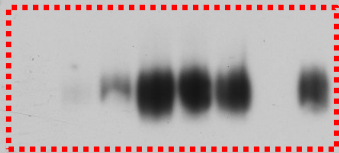

AT-034  
MOP; pS375

1 2 3 4 5 6 - 7

2.10.18

...FUJIFILM (SAFETY)...

...FUJIFILM...



FLAG-UMCK Konz. Reihe AT-034 v: 13.9.18

pT376

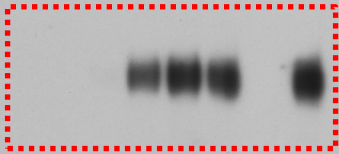

- 1 20
  - 2 10µM
  - 3 10µM
  - 4 10µM
  - 5 1µM
  - 6 10µM
  - 7 DAMGO 10µM
- } 30'  
37°C

1 2 3 4 5 6 - 7

pT379

AT-034

MOP; pT376

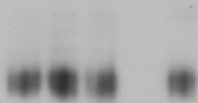

1 2 3 4 5 6 - 7

28.9.18

FLAG-hMOR  
HEU

Kontrollen AT-034 v: 13.9.18  
pT376

- 1 Ø
  - 2 1µM
  - 3 10µM
  - 4 100µM
  - 5 1µM
  - 6 10µM
  - + RANGO 10µM
- } 30'  
37°C

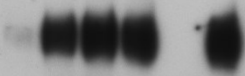

1 2 3 4 5 6 - 7

pT379

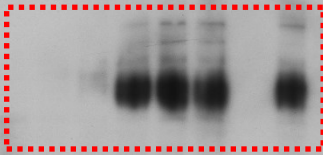

AT-034

MOP; pT379

1 2 3 4 5 6 - 7

28.9.18

FCAG-411111 Kont.reihe AT-034 v. 13.9.18

UMB

- 1 p
  - 2 10µm
  - 3 10µm
  - 4 10µm
  - 5 1µm
  - 6 10µm
  - + DARGO 10µm
- } 30'  
} 37°C

1 2 3 4 5 6 7

1 2 3 4 5 6 7

S. 10.18

...RUJI-HRC-(SAFEET

FCAG-411111  
HCH

Kont.reihe

AT-034

v. 13.9.18

UMB

- 1 p
  - 2 10µm
  - 3 10µm
  - 4 10µm
  - 5 1µm
  - 6 10µm
  - + DARGO 10µm
- } 30'  
} 37°C

1 2 3 4 5 6 7

1 2 3 4 5 6 7

AT-034

MOP

S. 10.18

...AFETY)...

**AT-324**

**NOP**

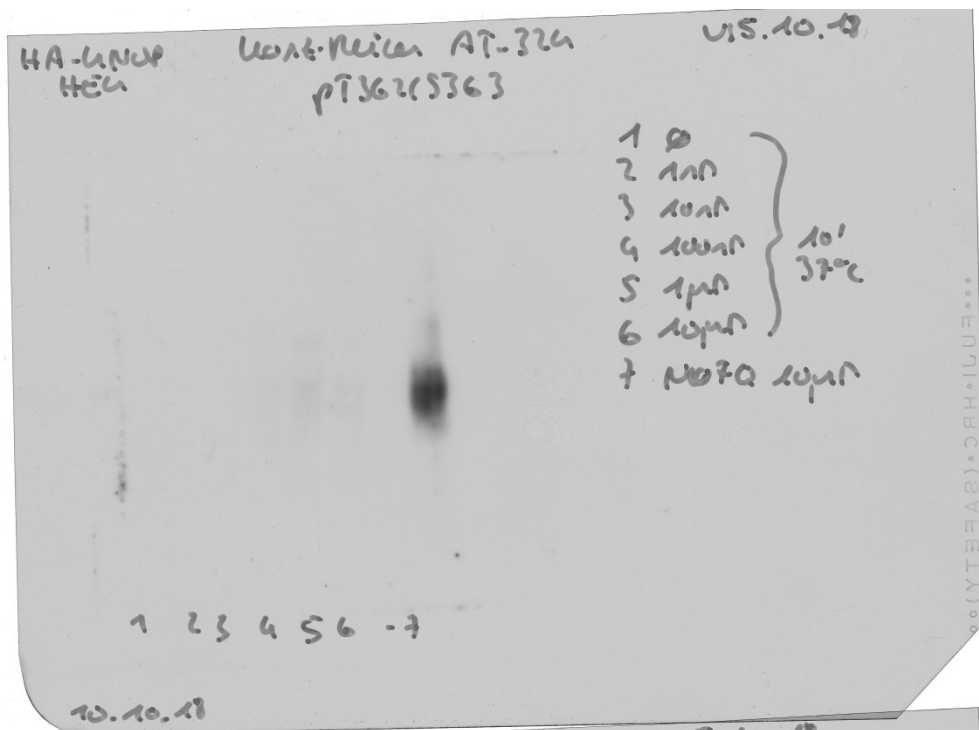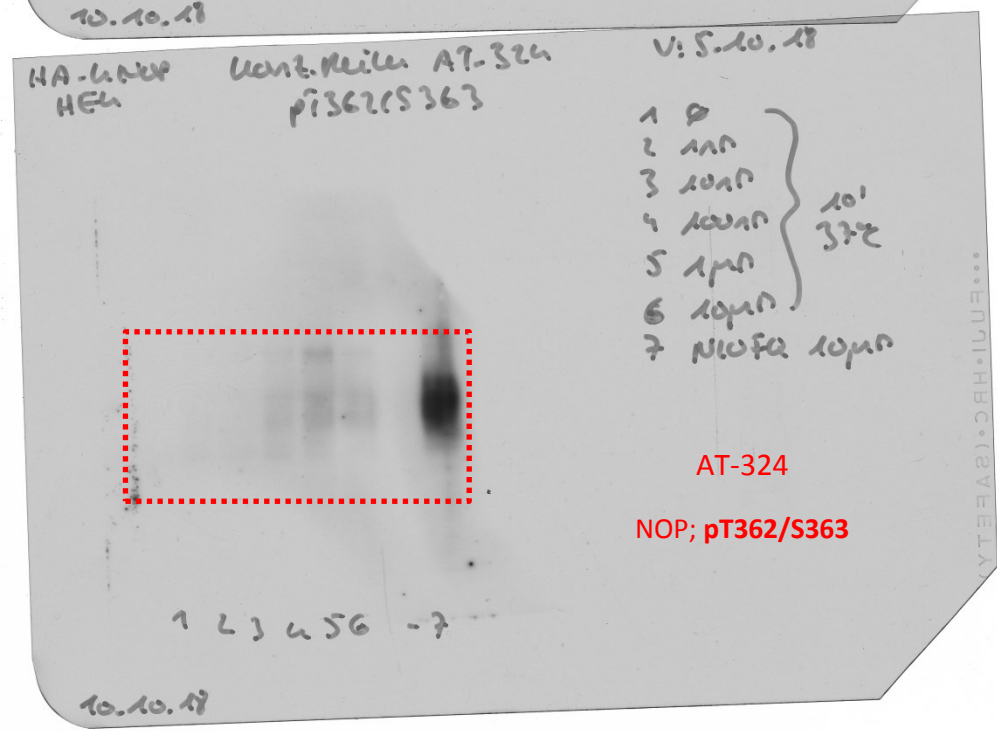

HA-LINOP  
HEK

Cont. Reiter AT-324  
4871

V: S. 10. 18

- 1 2
  - 2 1n
  - 3 10n
  - 4 100n
  - 5 1µn
  - 6 10µn
  - 7 N10FA 10µn
- } 37°C  
10'

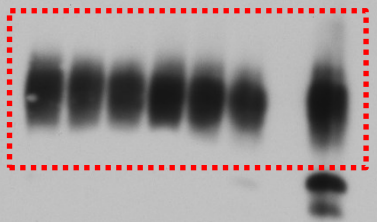

AT-324

NOP

1 2 3 4 5 6 - 7

...FUJI-HRC.(SAFETY)...

11.10.18

HA-LINOP  
HEK

Cont. Reiter AT-324  
pS346

V: S. 10. 18

- 1 2
  - 2 1n
  - 3 10n
  - 4 100n
  - 5 1µn
  - 6 10µn
  - 7 N10FA 10µn
- } 37°C  
10'

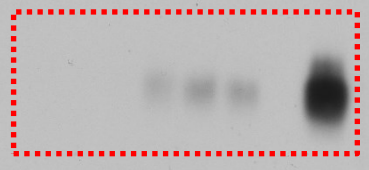

AT-324

NOP; pS346

1 2 3 4 5 6 - 7

...FUJI-HRC.(SAFETY)...

11.10.18

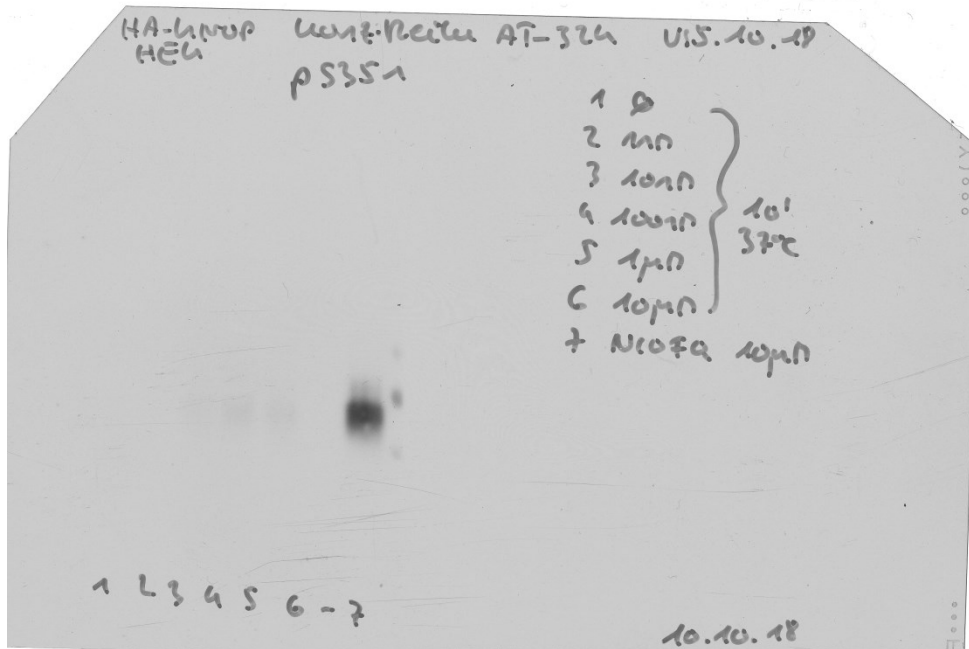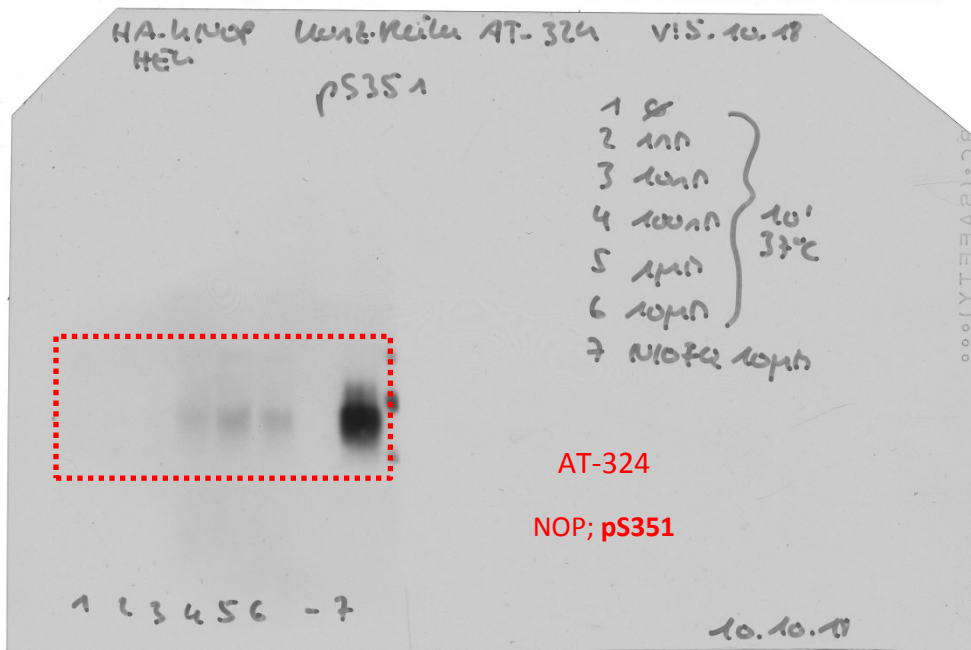

**AT-324**

**MOP**



FLAG-UMOR konz. Reihe AT-324 U: 13.9.11  
pT370

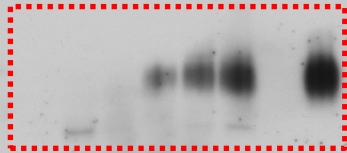

AT-324

MOP; pT370

1 0  
2 10µM  
3 10µM  
4 100µM } 30'  
5 1µM } 37°C  
6 10µM  
7 DAMGO 10µM

1 2 3 4 5 6 - 7

pS375

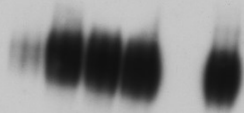

1 2 3 4 5 6 - 7

2.10.11

FLAG-HEK293T Kontr. Reihe AT-324 U: 13.9.18  
HEK293T p1370

...FUJI-HRC-(SAFETY)...

- 1 10<sup>6</sup>
  - 2 10<sup>6</sup>
  - 3 10<sup>6</sup>
  - 4 10<sup>6</sup>
  - 5 10<sup>6</sup>
  - 6 10<sup>6</sup>
  - 7 DAPI 10<sup>6</sup>
- } 30'  
37°C

1 2 3 4 5 6 . 7

pS375

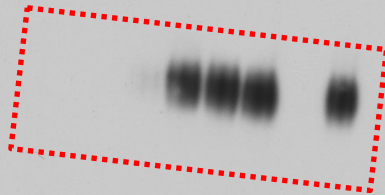

AT-324  
MOP; pS375

1 2 3 4 5 6 . 7

...FUJI-HRC-(SAFETY)...

2.10.18

FLAG-GFP HEK293 cells AT-324 11.13.18  
HEK293 pT376

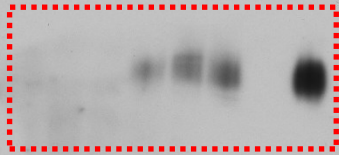

1 2 3 4 5 6 - 7

1 0.5  
2 1µM  
3 10µM  
4 100µM } 30'  
5 1µM } 37°C  
6 10µM  
7 DMSO 10µM

AT-324

MOP; pT376

pT379

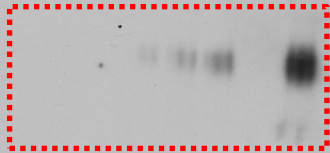

1 2 3 4 5 6 - 7

AT-324

MOP; pT379

28.9.18

...ENGLI-HRC-(SHEETY)...

FLAG-UMMR HEU Konz. Reihe AT-324 v: 13.9.18

UMB

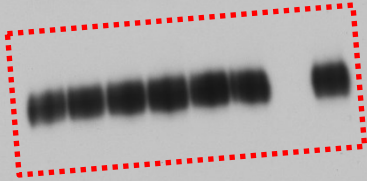

- 1  $\emptyset$
  - 2 1µM
  - 3 10µM
  - 4 100µM
  - 5 1µM
  - 6 10µM
  - 7 DAMGO 10µM
- } 37°C  
30'

1 2 3 4 5 6 - 7

AT-324

MOP

10.10.18

FLAG-UMMR HEU Konz. Reihe AT-324 v: 13.9.18

UMB

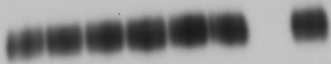

- 1  $\emptyset$
  - 2 1µM
  - 3 10µM
  - 4 100µM
  - 5 1µM
  - 6 10µM
  - 7 DAMGO 10µM
- } 37°C  
30'

1 2 3 4 5 6 - 7

10.10.18

...FUJI·HRC·(SAFETY)...

...FUJI·HRC·(SAFETY)...

**AT-201**

**NOP**

HA-UNOP UONZ-Reiter AT-201 U.S. 10. 18  
 HEN  
 PS 36

1 2  
 2 1000  
 3 1000  
 4 1000 } 101  
 5 1000 } 312  
 6 1000  
 7 N1072 1000

1 2 3 4 5 6 - 7

16.10.18

...FUJI-HRC-(S)AF

HA-UNOP UONZ-Reiter AT-201 U.S. 10. 18  
 HEN  
 PS 346

1 2  
 2 1000  
 3 1000 } 101  
 4 1000 } 312  
 5 1000  
 6 1000  
 7 N1072 1000

AT-201  
 NOP; pS346

16.10.18

1 2 3 4 5 6 - 7

HA-LINUP  
HEK

kont. Keim AT-201  
pT362/15363

U.S. 10.18

- 1 20
  - 2 100nM
  - 3 100nM
  - 4 100nM
  - 5 1µM
  - 6 10µM
  - 7 NoFQ 10µM
- } 10'  
37°C

1 2 3 4 5 6 - 7

10.10.18

HA-LINUP  
HEK

kont. Keim AT-201  
pS351

U.S. 10.18

- 1 20
  - 2 100nM
  - 3 100nM
  - 4 100nM
  - 5 1µM
  - 6 10µM
  - 7 NoFQ 10µM
- } 10'  
37°C

AT-201

NOP; pS351

1 2 3 4 5 6 - 7

12.10.18

HA-LAMP  
HEU

Wnt-Keim AT-201  
pT362/S363

U.S. 10.18

- 1 50
  - 2 100
  - 3 1000
  - 4 10000
  - 5 100000
  - 6 1000000
  - 7 NOFQ 10000
- } 10'  
30"

1 2 3 4 5 6 - 7

10.10.18

HA-LAMP  
HEU

Wnt-Keim AT-201  
pT362/S363

U.S. 10.18

- 1 50
  - 2 100
  - 3 1000
  - 4 10000
  - 5 100000
  - 6 1000000
  - 7 NOFQ 10000
- } 10'  
30"

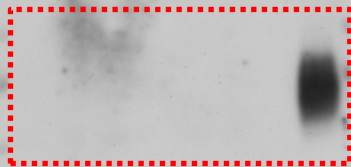

AT-201

NOP; pT362/S363

1 2 3 4 5 6 - 7

10.10.18



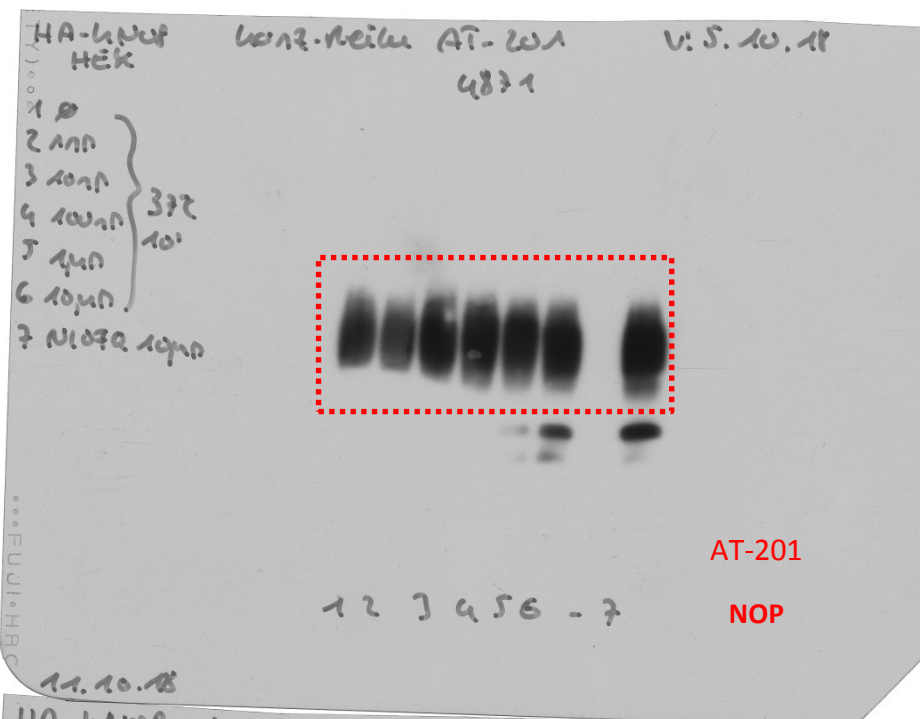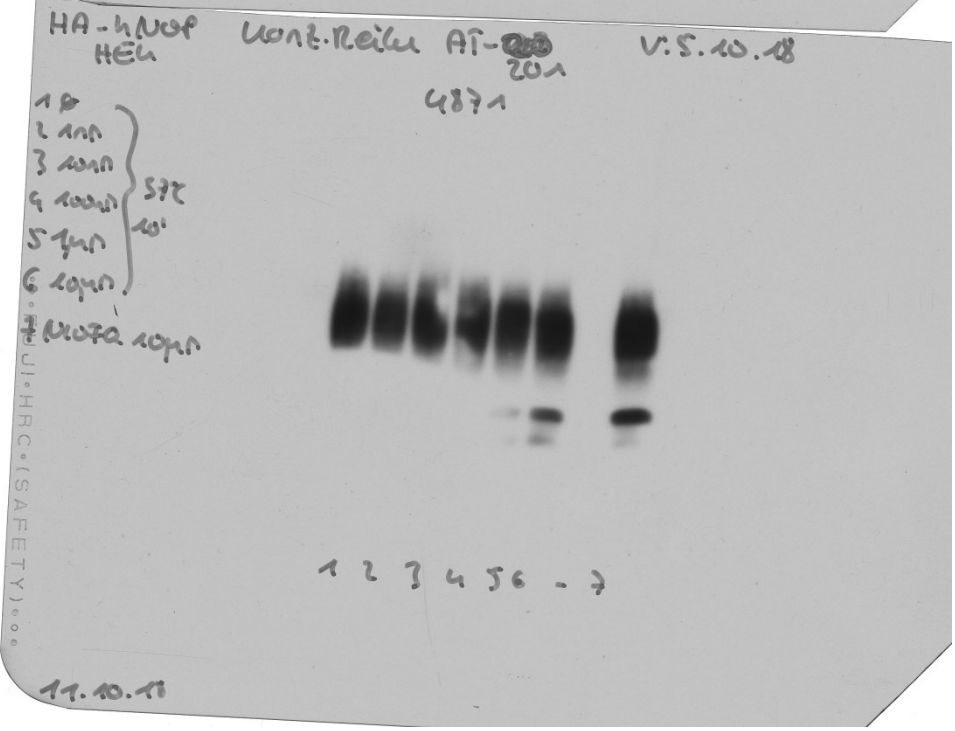

**AT-201**

**MOP**

FLAG-4MHA  
HEU

Leont. Neiler AT-201  
pS375

V. 12.9.18

- 1 Ø
  - 2 1µM
  - 3 10µM
  - 4 100µM
  - 5 1µM
  - 6 10µM
  - + DAMGO 10µM
- } 30'  
37°C

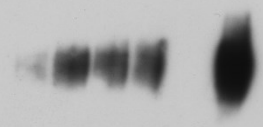

1 2 3 4 5 6 - 7

5.10.18

FLAG-4MHA  
HEU

Leont. Neiler AT-201  
pS375

V. ~~7.9.18~~  
13.9.18

- 1 Ø
  - 2 1µM
  - 3 10µM
  - 4 100µM
  - 5 1µM
  - 6 10µM
  - 7 DAMGO 10µM
- } 30'  
37°C

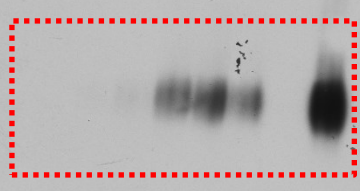

1 2 3 4 5 6 - 7

AT-201

MOP; pS375

27.9.18

FLAG-LMOR KAMB-Reilm AT-201 26.9.18  
HE4 pT376

1 0  
2 10µM  
3 10µM } 30'  
4 10µM } 37°C  
5 1µM  
6 10µM  
7 DMSO 10µM

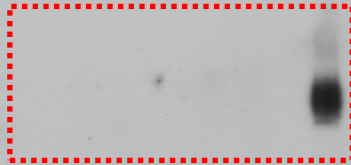

AT-201  
MOP; pT376

1 2 3 4 5 6 - 7  
pT379

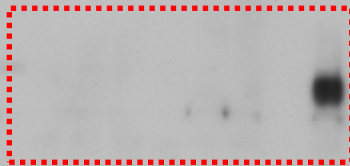

AT-201  
MOP; pT379

1 2 3 4 5 6 - 7

26.9.18

FUJIFILM SAFETY

FUJIFILM SAFETY

FLAG-LMCK Kontroll-Reihe AT-201 U: 13.9.18  
HEU

pT370

- 1 Ø
- 2 1µM
- 3 10µM
- 4 100µM } 30'
- 5 1µM } 37°C
- 6 10µM
- 7 DMSO 10µM

1 2 3 4 5 6 - 7

FLAG-LMCK Kontroll-Reihe AT-201 U: 13.9.18  
HEU

pT370

- 1 Ø
- 2 1µM
- 3 10µM
- 4 100µM } 30'
- 5 1µM } 37°C
- 6 10µM
- 7 DMSO 10µM

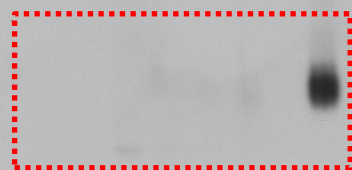

AT-201  
MOP; pT370

1 2 3 4 5 6 - 7

UJHRC (SAFETY)...

FLAG-UMC1 Comp: <sup>143</sup>Paile A7-201  
UMB

U: 13.9.18

- 1 0
  - 2 100nM
  - 3 100nM
  - 4 100nM
  - 5 100nM
  - 6 100nM
  - 7 DMSO 100nM
- } 30'  
37°C

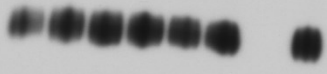

1 2 3 4 5 6 - 7

5.10.18

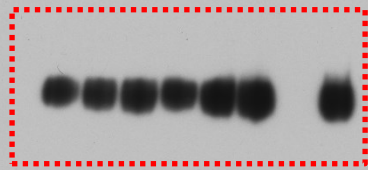

AT-201

MOP

**AT-121**

**NOP**

HA-hNCP  
HEU

Cont. Reim AT-121 V.17.8.18  
pS346

- 1 p
  - 2 10µl
  - 3 10µl
  - 4 10µl
  - 5 1µl
  - 6 10µl
  - + NoFA 10µl
- } 10'  
37°C

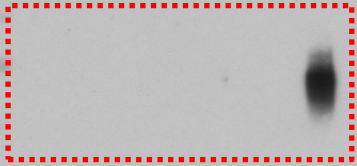

AT-121

NOP; pS346

1 2 3 4 5 6 - 7

4871

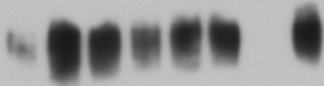

1 2 3 4 5 6 - 7

24.8.18



HA-LINCP UWB-Ricin AT-121 U: 17.8.17  
 pS351

1 p  
 2 10µM  
 3 10µM  
 4 10µM  
 5 1µM  
 6 10µM } 10'  
 37°C  
 7 NOFA 10µM

1 2 3 4 5 6 - 7

17.8.18

HA-LINCP UWB-Ricin AT-121 U: 17.8.18  
 HEL pS351

1 p  
 2 10µM  
 3 10µM  
 4 10µM  
 5 1µM  
 6 10µM } 10'  
 37°C  
 7 NOFA 10µM

AT-121  
 NOP; pS351

1 2 3 4 5 6 - 7

17.8.18

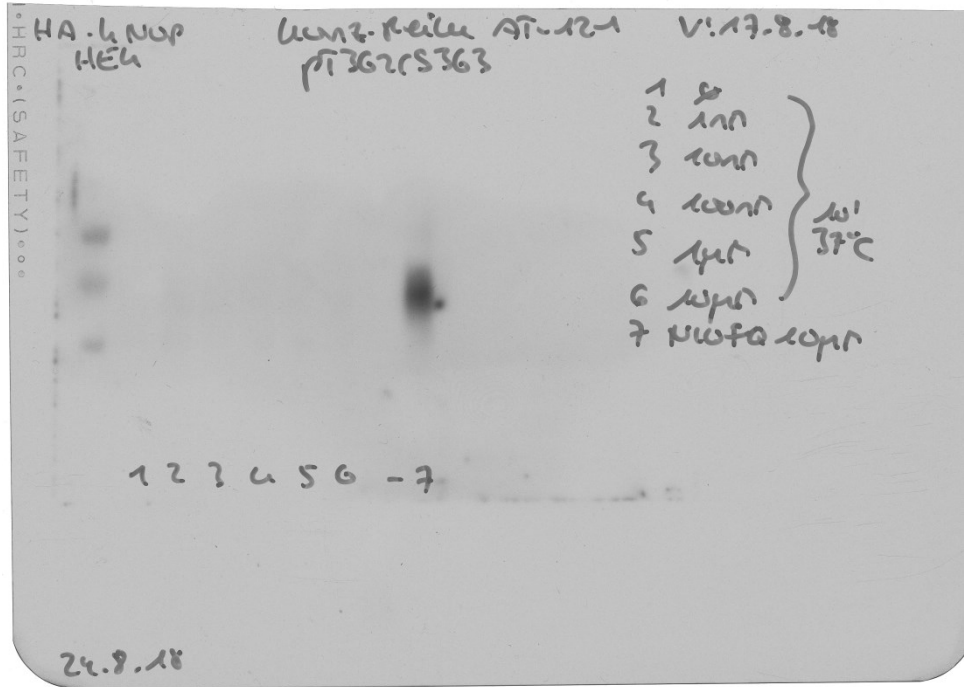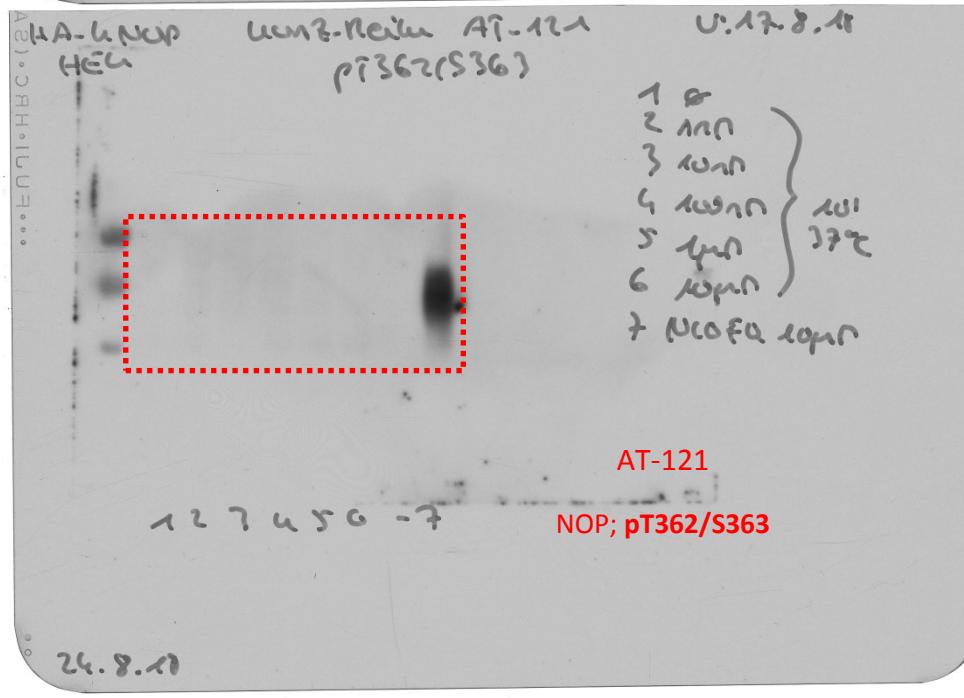

HA-hNCP  
HE4

uon2-Relix AT-121  
4871

V: 3.5.18

- 1 ∅
  - 2 10µl
  - 3 10µl
  - 4 10µl
  - 5 1µl
  - 6 10µl
  - 7 N10F2 10µl
- } 10'  
37°C

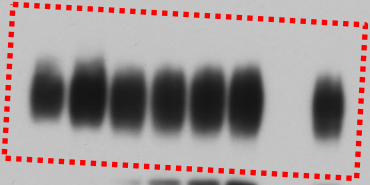

...HRC (SAFETY)...

AT-121

NOP

1 2 3 4 5 6 - 7

16.7.18

HA-hNCP  
HE4

uon2-Relix AT-121  
4871

V: 3.8.18

- 1 ∅
  - 2 10µl
  - 3 10µl
  - 4 10µl
  - 5 1µl
  - 6 10µl
  - 7 N10F2 10µl
- } 10'  
37°C

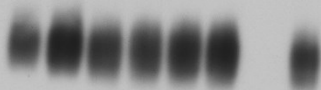

...HRC (SAFETY)...

1 2 3 4 5 6 - 7

16.8.18

**AT-121**

**MOP**

FLAG-LMOR HEK Wnt3-RecM AT-121

V: 25.5.18

pT370

- 1 0
  - 2 10n
  - 3 10n
  - 4 10n
  - 5 10n
  - 6 10n
- } AT-121  
pT370

7 DAMGO  
10n

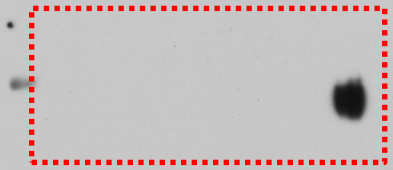

AT-121  
MOP; pT370

1 2 3 4 5 6 - 7

pS35

x

1 2 3 4 5 6 - 7

25.5.18

FLAG-MOP HEM Kont. Reihe AT-121

v: 23.5.18

pT370

1 p  
2 2µM  
3 2µM  
4 1µM  
5 10µM  
6 DMSO  
10µM

AT-121  
pS375

1 2 3 4 5 6 - 7

pS375

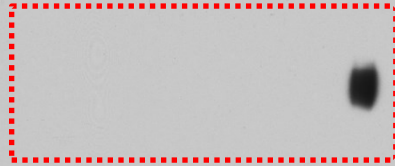

AT-121  
MOP; pS375

1 2 3 4 5 6 - 7

25.5.18

FLAG-HMM (H3H) Western Blot  
AT-121  
pT376

v: 23.5.18

AT-121

MOP; pT376

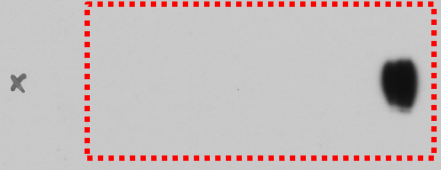

1 2 3 4 5 6 7

pT379

1 0  
2 10µM  
3 10µM  
4 100µM  
5 1µM  
6 10µM  
7 DAPI 10µM  
} AT-121  
30' 37°C

1 2 3 4 5 6 7

24.5.18

FIAG-hMER HEM Gene-Rück v: 23.5.18

AT-121

pT376

|   |         |   |                    |
|---|---------|---|--------------------|
| 1 | 10      | } | AT-121<br>30' 37°C |
| 2 | 100     |   |                    |
| 3 | 1000    |   |                    |
| 4 | 10000   |   |                    |
| 5 | 100000  |   |                    |
| 6 | 1000000 |   |                    |

7 DAMBO 10µl

1 2 3 4 5 6 7

pT379

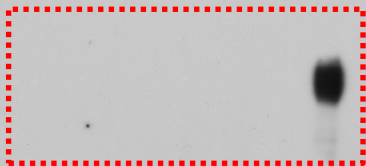

AT-121

MOP; pT379

1 2 3 4 5 6 7

24.5.18

...FUJI-HRC-(SAFETY)...

...TY)...



FLAG-UMC18 Umr3-Ruler AT-121 U: 29.5.18  
HEU

UMC18

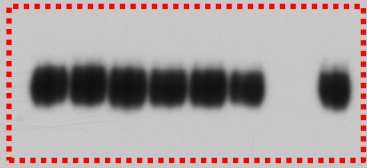

1 2 3 4 5 6 - 7

UMC18

AT-121

MOP

- 1 Ø
  - 2 1µM
  - 3 10µM
  - 4 100µM
  - 5 1mM
  - 6 10mM
- } AT-121  
30' 37°C

7 DMSO

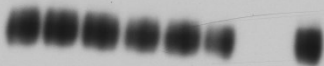

1 2 3 4 5 6 - 7

29.5.18

**Cebranopadol**

**NOP**

HA-LINPR  
HEH

Levi-Rilla Cebranopadol ©

v: 23.4.19

pS346

- 1 0
- 2 100n
- 3 100n
- 4 1000n
- 5 1µn
- 6 10µn
- 7 1000µ 10µn

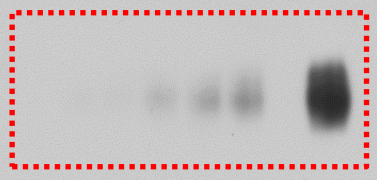

cebranopadol 10'  
NOP; pS346

1 2 3 4 5 6 - 7

pS351

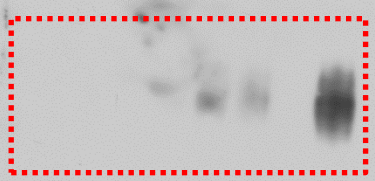

cebranopadol  
NOP; pS351

1 2 3 4 5 6 - 7

3.5.19

HA-6WUPR  
HEK

kont. Reihe Cebranopadol

U: 23.4.19

- 1 0
- 2 100n
- 3 100n
- 4 100n
- 5 100n
- 6 100n
- 7 100n
- 101

pS35 1

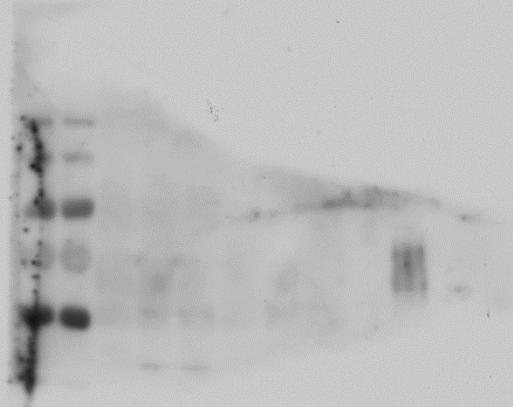

1 2 3 4 5 6 7

pT362/S363

cebranopadol  
NOP; pT362/S363

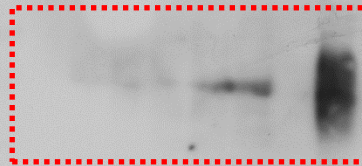

1 2 3 4 5 6 7

31.4.19

...ENTRI-HRC-(VEEELI)...

HA-4Puff  
HEK

Konz. Reihe Cebromanopadol  
4871

11.23.4.19

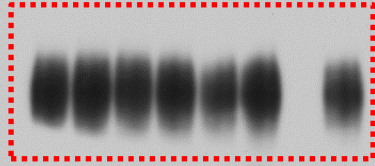

- 1 0
  - 2 10nM
  - 3 100nM
  - 4 1000nM
  - 5 1µM
  - 6 10µM
  - 7 N107Q 10µM
- 70'

cebranopadol

NOP

1 2 3 4 5 6 - 7

4871

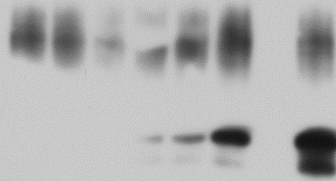

1 2 3 4 5 6 - 7

9.5.19

...FUJIFILM SAFETY...

...FUJIFILM...

**Cebranopadol**

**MOP**

FLAG-hMOP Konz. Reihe Cebranopadol 12.5.19  
HEM U:

pT370

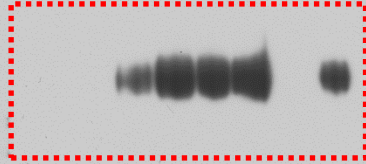

- 1 0
  - 2 10nM
  - 3 100nM
  - 4 1000nM
  - 5 1µM
  - 6 10µM
  - 7 DMSO 10µM
- 30'

cebranopadol

MOP; pT370

1 2 3 4 5 6 - 7

pS375

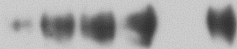

1 2 3 4 5 6 - 7

3.5.19

FLAG-GMNA  
HEK

Ucnf-Rein Cebranopadol  
pS375

U. 11.4.19

- 1 0
- 2 1µM
- 3 10µM
- 4 100µM
- 5 1µM
- 6 10µM
- 7 DAMGO 10µM  
30'

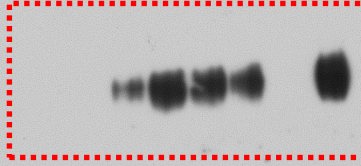

cebranopadol

MOP; pS375

1 2 3 4 5 6 - 7

3.5.19



FLAG-klonir kont. Reika Cebtranopadol  
HEu pT376 U: 17.4.19

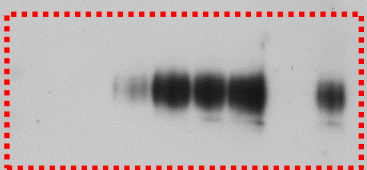

- 1 0
- 2 100n
- 3 100n
- 4 100n
- 5 100n
- 6 100n
- 7 OAMGO 100n

1 2 3 4 5 6 - 7  
pT379

cebranopadol 30'  
MOP; pT376

31.4.19

000(YEELY)000  
000(YEELY)000

FLAG-LINER Konz. Reilm Cebtranopadol ©  
HEU V: 17.4.19

pT376

- 1 0
  - 2 1µM
  - 3 10µM
  - 4 100µM
  - 5 1µM
  - 6 10µM
  - 7 DMSO 10µM
- 30'

1 2 3 4 5 6 - 7

pT379

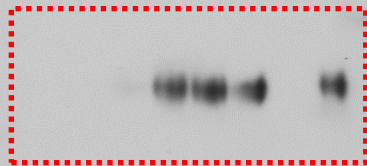

cebranopadol  
MOP; pT379

1 2 3 4 5 6 - 7

31.4.19

CMO

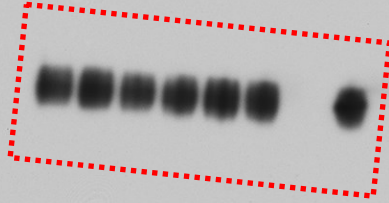

1 2 3 4 5 6 - 7

cebranopadol

MOP

**N/OFQ**

**NOP**

NA-Happ Quantifizierung u871  
kont. Piler  
Cabr. Noci

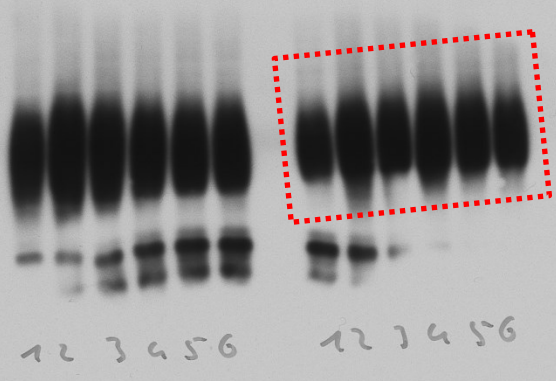

- 1 #
- 2 int
- 3 int
- 4 100nt
- 5 int
- 6 100nt

N/OFQ

NOP

19.1.16

• FUJI  
1000

HA-hNOPP Konz-Reihe  
Cebrenopadol pS351 Noiceptin

- 1 Ø
- 2 1µM
- 3 10µM
- 4 100µM
- 5 1µM
- 6 10µM
- 7

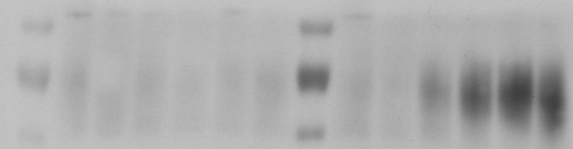

1 2 3 4 5 6    1 2 3 4 5 6

HA-beads 30µl  
1,5h 4°C  
SDS 60µl 50°C  
30'

22.1.16

•FUJISAFETY)•••

HA-hNOPP Konz-Reihe  
Cebrenopadol pS351 Noiceptin

N/O/FQ

NOP; pS351

- 1 Ø
- 2 1µM
- 3 10µM
- 4 100µM
- 5 1µM
- 6 10µM

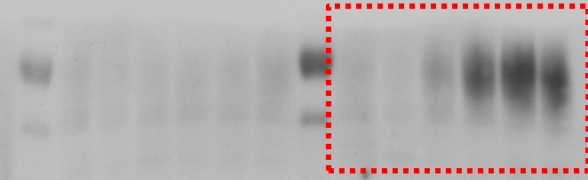

1 2 3 4 5 6    1 2 3 4 5 6

HA-beads 30µl  
1,5h 4°C  
SDS 60µl 50°C  
30'

22.1.16

(YTERE) IJUE

HA-hNOPR Wort-Rauhe  
Cetirizindiol pT362(S367) Noicephi

- 1 Ø
- 2 1nM
- 3 10nM
- 4 100nM
- 5 1µM
- 6 10µM

• FUJI (SAFETY) •••

1 2 3 4 5 6    1 2 3 4 5 6

HA-beads 30µl  
1,5h 4°C  
SDS 60µl 50°C  
30'

22.1.16

HA-hNOPR Wort-Rauhe  
Cetirizindiol pT362(S363) Noicephi

- 1 Ø
- 2 1nM
- 3 10nM
- 4 100nM
- 5 1µM
- 6 10µM

• FUJI (SAFETY) •••

1 2 3 4 5 6    1 2 3 4 5 6

HA-beads 30µl  
1,5h 4°C  
SDS 60µl 50°C  
N/OFQ 30'

NOP; pT362/S363

HA-hUVR UVR. Reim pS346

- 1 0
- 2 1nM
- 3 10nM
- 4 100nM
- 5 1µM
- 6 10µM

Prepns  
Noci

SCH221510  
R064

N/OFG

NOP; pS346

37°C 10'

HA-beads 30µl  
1.5h 4°C

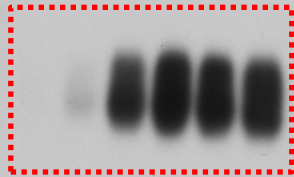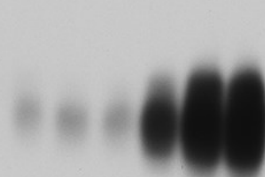

1 2 3 4 5 6

1 2 3 4 5 6

SDS 60µl  
50°C 30'

MCOPP3

SCH221510

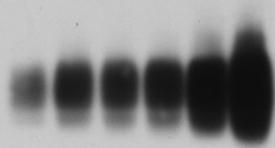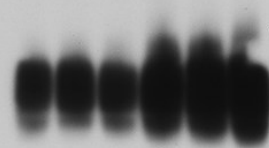

1 2 3 4 5 6

1 2 3 4 5 6

...FUJIFILM (SAFETY)...



**DAMGO**

**MOP**

FLAG-MOP Lent. Peiler DAMGO U: 29.8.18  
HEK PT376

v: 1

v: 2

...FUJIFILM SAFETY...

DAMGO

MOP; pT376

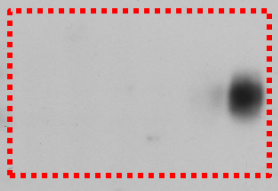

1 2 3 4 5 6

1 2 3 4 5 6

PT376

1 0  
2 10nM  
3 20nM  
4 40nM  
5 1µM  
6 10µM } 30'  
37°C  
DAMGO

...FUJIFILM SAFETY...

1 2 3 4 5 6

1 2 3 4 5 6

31.8.18

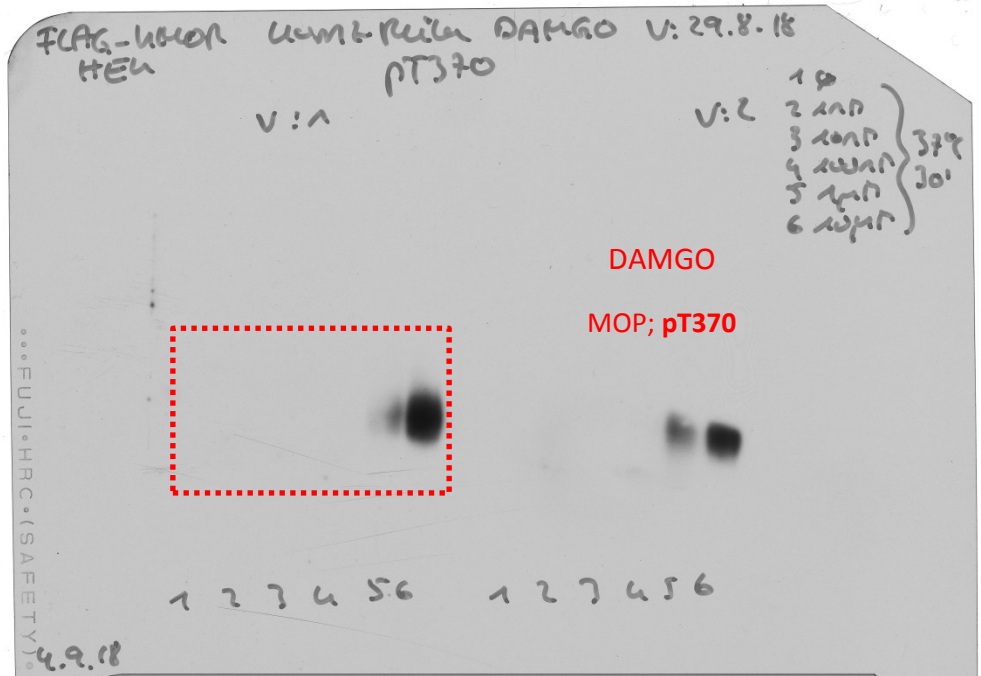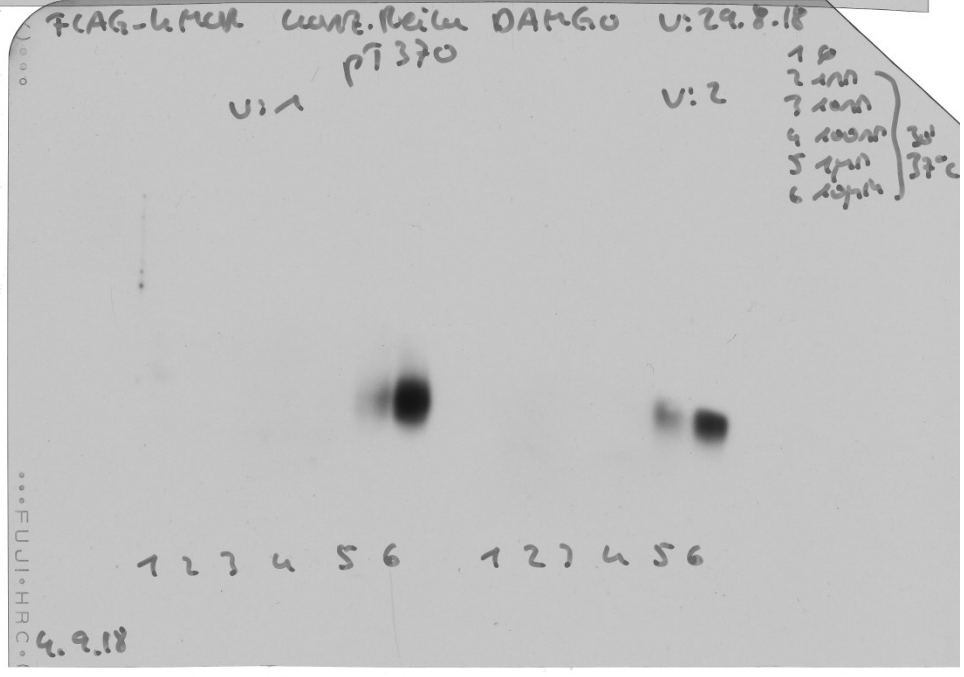

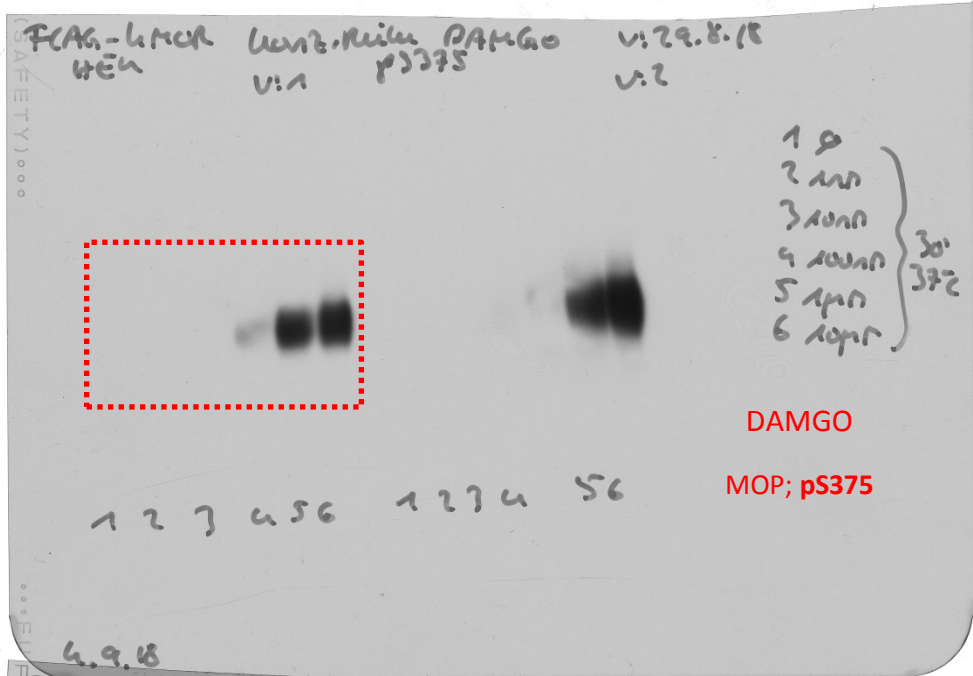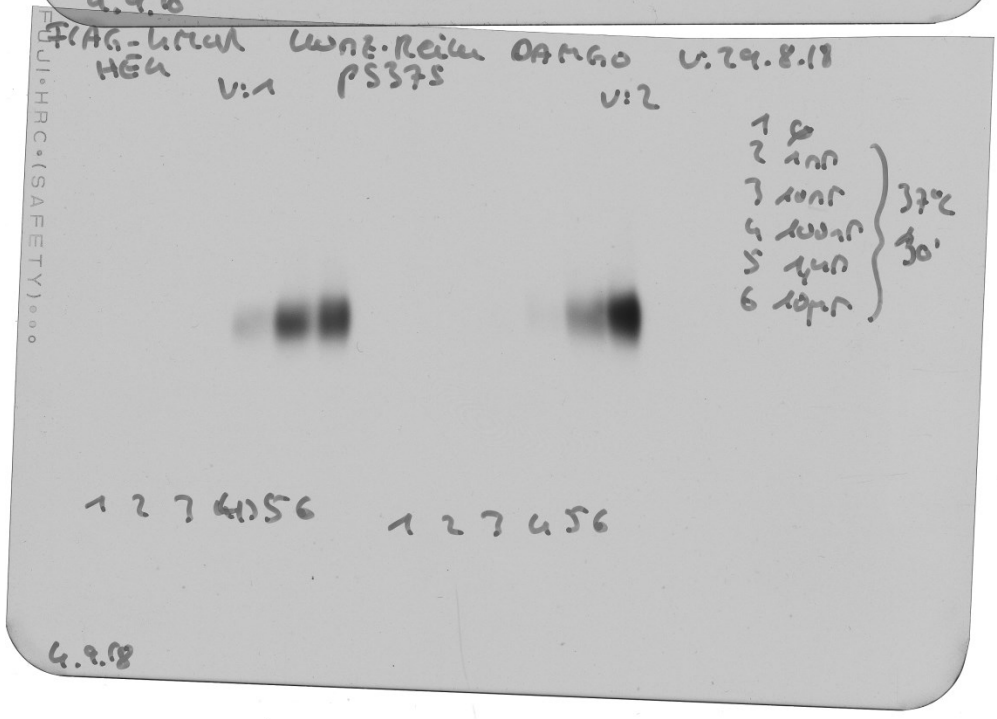

FLAG-HER2 Konze-Reihe HER U: 29.8.18  
HEK V: 1 PT376 V: 2

1 2 3 4 5 6 1 2 3 4 5 6  
PT379

1 0  
2 100nM  
3 100nM  
4 100nM } 301  
5 1µM } 37°C  
6 10µM

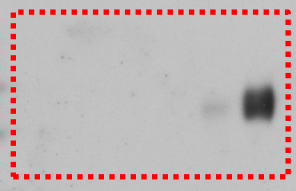

DAMGO  
MOP; pT379

1 2 3 4 5 6 1 2 3 4 5 6

31.8.18

FLAG-HMPK KONTROL DAMGO v: 29.8.18  
UMI

- 1 20
  - 2 100n
  - 3 100n
  - 4 100n
  - 5 100n
  - 6 100n
- } 30'  
37°C

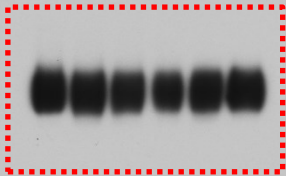

DAMGO  
MOP

1 2 3 4 5 6

6.9.18

FLAG-HMPK KONTROL DAMGO v: 29.8.18  
HEK UMI

- 1 20
  - 2 100n
  - 3 100n
  - 4 100n
  - 5 100n
  - 6 100n
- } 30'  
37°C

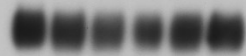

1 2 3 4 5 6

6.9.18

**Supplementary figure 1. Uncropped images of western blots depicted in figure 4.**

For NOP, the rabbit polyclonal phosphosite-specific anti-S346 7TM0320A (previously known as 5034), anti-pS351 7TM0320B (previously known as 4876) and anti-pT362/S363 7TM0320C (previously known as 4874) as well as the phosphorylation-independent anti-NOP 7TM0320N (previously known as 4871) antibodies were used. The monoclonal phosphorylation-independent anti-MOP receptor antibody 7TM0319N (previously known as UMB-3) and phosphosite-specific antibodies anti-pT370 7TM0319B1 (previously known as 3196), anti-pS375 7TM0319C (previously known as 2493), anti-pT376 7TM0319D (previously known as 3723) and anti-pT379 7TM0319E (previously known as 3686) were used for MOP. The cropped parts of the blots used in figure 4 are depicted in red boxes.
